# Supplementary material
Source: PubMed Central journal article supplement (PMC7719064)
Supplement: NIHMS1642456-supplement-Supplementary_Tables.pdf [file NIHMS1642456-supplement-Supplementary_Tables.pdf]

## SUPPLEMENTARY TABLES

### Supplementary Table 1. Questions on dietary intake at the ASMIC Baseline Questionnaire

---

#### Questions on dietary intake

---

1. How often in the last month have you eaten yogurt or kefir?

- >1 per day
  - Daily
  - Every week, but not every day
  - < 1 per week
  - None
- 

2. How often in the last 2 weeks have you taken a Daily probiotic, such as Culturelle, TruBiotics, or Florastor?

- Daily
  - Every week, but not every day
  - < 1 per week
  - None
- 

3. Which of the following statements most closely describes your current diet?

- I eat meat/fish/poultry at least 3 days per week
  - I eat meat/fish/poultry at least 2 days, but no more \_\_\_\_\_ than 2 days per week
  - I eat eggs/cheese/other dairy, but no meat/fish/poultry
  - I do not eat animal products at all (no meat or dairy)
  - I do not eat animal products and at least 70% of my fruits and vegetables are eaten raw
- 

4. How many servings of fruit do you eat in an average day or week?

- per Day
  - per Week
- 

5. How many servings of vegetables do you eat in an average day or week?

- per Day
  - per Week
-

**Supplementary Table 2.** Bacterial taxa associated with CRC<sup>18</sup> or aspirin.<sup>17</sup>

| Taxa associated with CRC in 5+ out of 8 studies in the meta-analysis <sup>18</sup> | Taxa associated with CRC in 8 studies combined in the meta-analysis <sup>18</sup> | Taxa associated with aspirin <sup>17</sup> |
|------------------------------------------------------------------------------------|-----------------------------------------------------------------------------------|--------------------------------------------|
| <i>Parabacteroides distasonis</i> (species)                                        | <i>Akkermansia muciniphila</i> (species)                                          | <i>Bacteroides</i> (genera)                |
| <i>Parviromonas micra</i> (species)                                                | <i>Methanosphaera stadtmanae</i> (species)                                        | <i>Barnesiella</i> (genera)                |
| <i>Streptococcus anginosus</i> (species)                                           | <i>Lactobacillus</i> (genera)                                                     | <i>Prevotella</i> (genera)                 |
| <i>Fusobacterium</i> (genera)                                                      | <i>Dialister pneumosintes</i> (species)                                           | <i>Ruminococaceae</i> (family)             |
| <i>Ruminococcus</i> (genera)                                                       | <i>Blautia Luti and obeum</i> (species)                                           |                                            |
| <i>Dorea</i> (genera)                                                              | <i>Faecalibacterium prausnitzii</i> (species)                                     |                                            |
| <i>Porphyromonas</i> (genera)                                                      | <i>Pantoea agglomerans</i> (species)                                              |                                            |
|                                                                                    | <i>Succinivibrio</i> (genera)                                                     |                                            |
|                                                                                    | <i>Eubacterium hallii</i> (species)                                               |                                            |

**Supplementary Table 3.** Alpha diversity assessed by Shannon index (mean  $\pm$  standard error) of stool bacterial communities.

| Treatment | Collection | <i>n</i> | Shannon index   |
|-----------|------------|----------|-----------------|
| Aspirin   | 1          | 30       | 3.63 $\pm$ 0.09 |
|           | 2          | 29       | 3.64 $\pm$ 0.08 |
|           | 3          | 27       | 3.58 $\pm$ 0.10 |
|           | 4          | 28       | 3.64 $\pm$ 0.07 |
|           | 5          | 29       | 3.69 $\pm$ 0.07 |
| Placebo   | 1          | 19       | 3.65 $\pm$ 0.08 |
|           | 2          | 19       | 3.60 $\pm$ 0.11 |
|           | 3          | 20       | 3.47 $\pm$ 0.11 |
|           | 4          | 20       | 3.61 $\pm$ 0.09 |
|           | 5          | 20       | 3.64 $\pm$ 0.08 |
